# Supplementary material for: Unravelling the Genetic Architecture of Serum Biochemical Indicators in Sheep
Source: Preprints.org preprint supplement (doi:10.20944/preprints202406.1548.v1), 2024-06-21
Supplement: Supplementary file 1 [file supplementary]

| **a)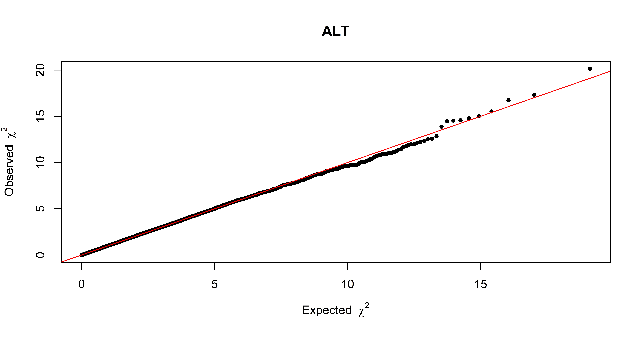** | **b)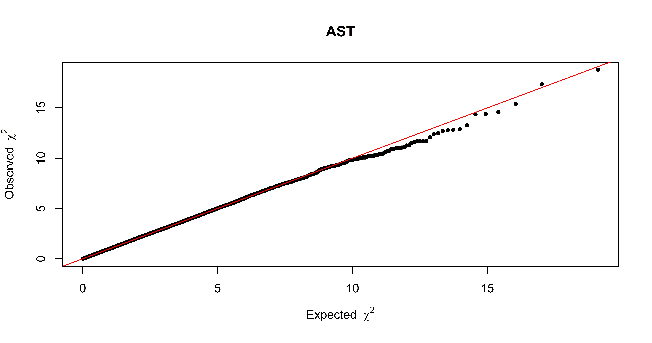** |
| --- | --- |
| **c)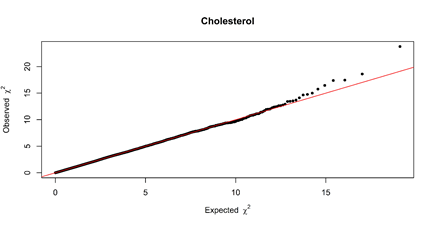** | **d)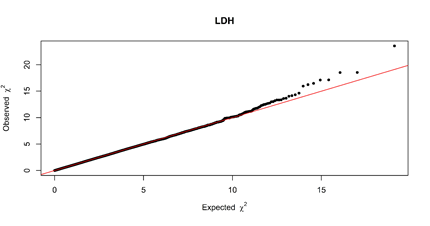** |
| **e)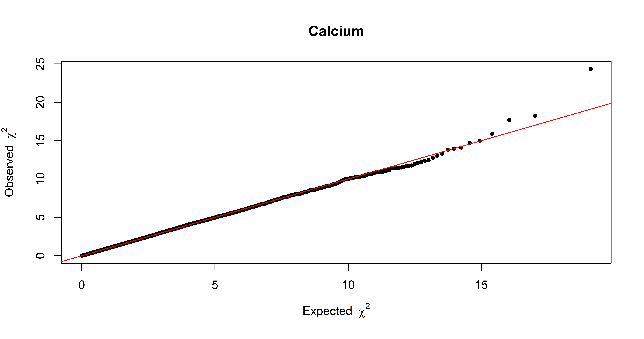** | **f)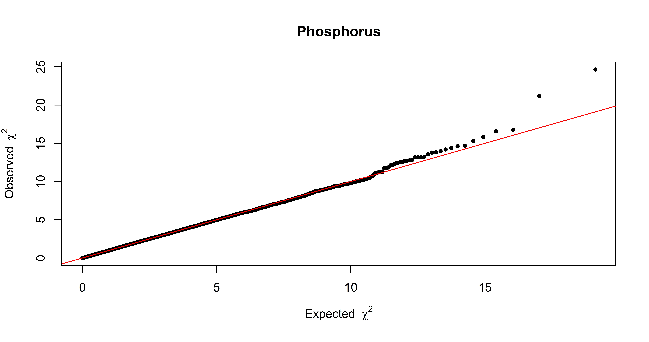** |
| **g)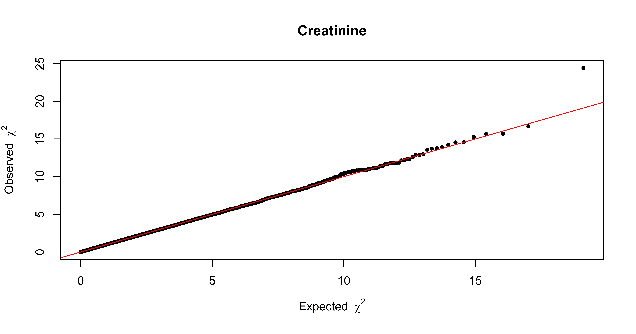** | **h)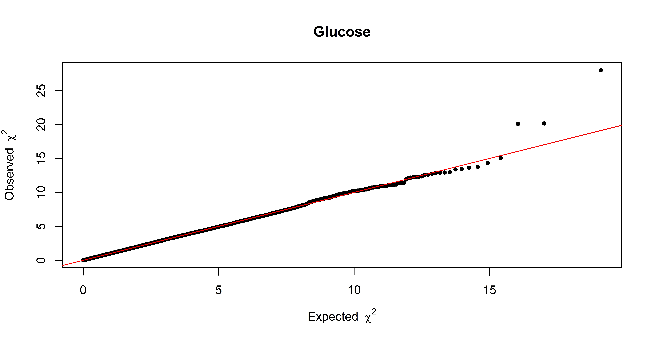** |
| **i)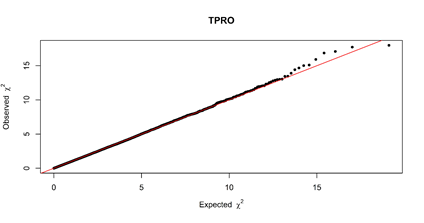** | **j)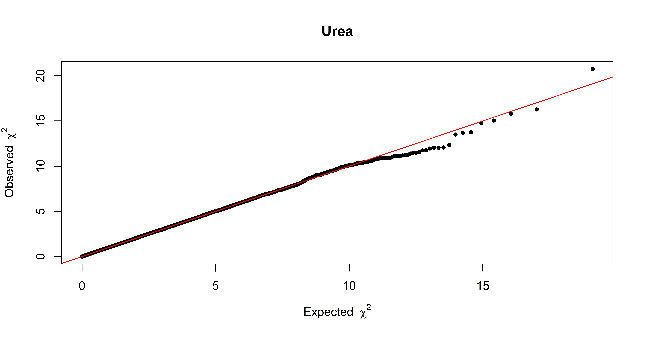** |
| **Supplementary Fig. 1** Quantile–quantile (Q–Q) diagram of the effects of population stratification. Q–Q plot showing the late separation between observed and expected values. The red lines indicate the null hypothesis of no true association. Deviation from the expected *p-*value (expressed as –log10(*p*) distribution is evident only in the tail area for serum biochemical indicators, indicating that population stratification was properly controlled. | |
